# Supplementary material
Source: PubMed Central journal article supplement (PMC4701141)

## SUPPLEMENTARY DATA

Table S1. Localities of study sites, plant species studied and methods used (LT = light-trapping. OBS = Direct observations, CAM = motion activated cameras).

| Site             | Coordinates<br>(decimal degrees) | Plant species                                                                                                                     | Methods  |
|------------------|----------------------------------|-----------------------------------------------------------------------------------------------------------------------------------|----------|
| Amatikulu        | -29.129689°, 31.573216°          | <i>Crinum delagoanse</i>                                                                                                          | LT, OBS  |
| Fort Nottingham  | -29.402742°, 29.932206°          | <i>Harveya speciosa</i>                                                                                                           | LT, OBS  |
| Greytown         | -29.149107°, 30.615174°          | <i>Crinum bulbispermum</i>                                                                                                        | OBS      |
| Hilton           | -29.513620°, 30.301135°          | <i>Harveya speciosa</i>                                                                                                           | OBS, CAM |
| Mabibi           | -27.329277° 32.746083°           | <i>Bonatea lamprophylla</i>                                                                                                       | OBS      |
| Mapungubwe       | -22.225906° 29.363047°           | <i>Sesamothamnus lugardii</i>                                                                                                     | OBS, CAM |
| Midmar           | -29.541851° 30.191700°           | <i>Crinum bulbispermum</i>                                                                                                        | LT, OBS  |
| Mt Gilboa        | -29.284375° 30.292654°           | <i>Gladiolus longicollis</i>                                                                                                      | LT, OBS  |
| Ndumo            | -26.894369° 32.207621°           | <i>Crinum paludosum</i> , <i>Gardenia volkensii</i> , <i>Gardenia cornuta</i>                                                     | OBS      |
| Pietermaritzburg | -29.624294° 30.406320°           | <i>Crinum macowanii</i> , <i>Crinum moorei</i> , <i>Gardenia thunbergii</i> , <i>Ipomoea alba</i> , <i>Hedychium gardnerianum</i> | OBS, CAM |
| Sani pass        | -29.631085° 29.415142°           | <i>Harveya speciosa</i>                                                                                                           | OBS      |
| St Lucia         | -28.359821° 32.416617°           | <i>Crinum delagoanse</i>                                                                                                          | LT, OBS  |
| Stainbank        | -29.905972° 30.947058°           | <i>Oxyanthus pyriformis</i>                                                                                                       | LT, OBS  |
| Tembe            | -27.043882° 32.423958°           | <i>Cladostemon kirkii</i>                                                                                                         | OBS      |
| Umtamvuna        | -31.020303° 30.176328°           | <i>Rangaeris muscicola</i>                                                                                                        | LT, OBS  |
| Vernon Crookes   | -30.268570° 30.602486°           | <i>Gladiolus longicollis</i>                                                                                                      | LT, OBS  |

Table S2. Corolla dimensions and nectar properties of plant species in South Africa with long-tubed flowers. Values are means  $\pm$  s.e.

| Family         | Species                           | Study site           | Flo<br>wers<br>sam<br>pled | Corolla tube<br>length (mm) | Stigma-<br>nectar<br>distance<br>(mm) | Nectar<br>volume<br>( $\mu$ l) | Nectar sugar<br>concentration<br>(%) |
|----------------|-----------------------------------|----------------------|----------------------------|-----------------------------|---------------------------------------|--------------------------------|--------------------------------------|
| Amaryllidaceae | <i>Crinum macowanii</i>           | Pietermaritz<br>burg | 10                         | 113 $\pm$ 4.0               | 190 $\pm$ 6.7                         | 33.9 $\pm$ 6.1                 | 20.5 $\pm$ 1.2                       |
|                | <i>Crinum<br/>bulbispermum</i>    | Greytown             | 10                         | 75 $\pm$ 7.6                | 162 $\pm$ 4.6                         | 3.7 $\pm$ 0.7                  | 12.3 $\pm$ 1.6                       |
|                |                                   | Midmar               | 10                         | 74 $\pm$ 1.8                | 156 $\pm$ 3.4                         | 39.5 $\pm$ 9.4                 | 18.3 $\pm$ 0.6                       |
|                | <i>Crinum delagoanse</i>          | St Lucia             | 9                          | 115 $\pm$ 3.1               | 217 $\pm$ 4.1                         | 21.8 $\pm$ 16.3                | 18.8 $\pm$ 4.2                       |
|                |                                   | Amatikulu            | 8                          | 107 $\pm$ 4.1               | 164 $\pm$ 8.2                         | 17.2 $\pm$ 5.2                 | 21.8 $\pm$ 6.6                       |
|                | <i>Crinum moorei</i>              | Pietermaritz<br>burg | 7                          | 104 $\pm$ 2.6               | 177 $\pm$ 7.1                         | 20.4 $\pm$ 8.6                 | 18.4 $\pm$ 1.0                       |
|                | <i>Crinum paludosum</i>           | Ndumo                | 7                          | 116 $\pm$ 4.2               | 179 $\pm$ 12.1                        | 20.0 $\pm$ 7.6                 | 12.0 $\pm$ 0.6                       |
| Orchidaceae    | <i>Rangaeris muscicola</i>        | Umtamvuna            | 41                         | 112 $\pm$ 1.0               | -                                     | 9.9 $\pm$ 1.5                  | 12.3 $\pm$ 0.6                       |
|                | <i>Bonatea<br/>lamprophylla</i>   | Mabibi               | 4                          | 103 $\pm$ 1.7               | -                                     | -                              | -                                    |
| Iridaceae      |                                   | Tshengwe             | 3                          | 127 $\pm$ 2.7               | -                                     | 25.0 $\pm$ 5.0                 | 23.0 $\pm$ 0.0                       |
|                | <i>Gladiolus longicollis</i>      | Mt Gilboa            | 289                        | 93 $\pm$ 9                  | -                                     | 10.1 $\pm$ 1.9                 | 28.3 $\pm$ 0.6                       |
|                |                                   | Vernon<br>Crookes    | 98                         | 95 $\pm$ 14                 | -                                     | 17.8 $\pm$ 2.6                 | 24.2 $\pm$ 1.3                       |
| Orobanchaceae  | <i>Harveya speciosa</i>           | Fort<br>Nottingham   | 9                          | 87 $\pm$ 3.2                | 87 $\pm$ 9.8                          | 7.7 $\pm$ 1.6                  | 18.0 $\pm$ 0.4                       |
|                |                                   | Sani pass            | 6                          | 89 $\pm$ 1.8                | -                                     | 14.6 $\pm$ 3.8                 | 25.8 $\pm$ 1.8                       |
|                |                                   | Hilton               | 13                         | 79 $\pm$ 2.5                | 73 $\pm$ 2.3                          | 34.0 $\pm$ 4.8                 | 21.1 $\pm$ 0.7                       |
| Pedaliaceae    | <i>Sesamothamnus<br/>lugardii</i> | Mapungubw<br>e       | 16                         | 100 $\pm$ 1.5               | 137 $\pm$ 4.3                         | 9.2 $\pm$ 2.9                  | 24.0 $\pm$ 1.1                       |
| Rubiaceae      | <i>Oxyanthus pyriformis</i>       | Stainbank            | 10                         | 92 $\pm$ 2.2                | 103 $\pm$ 2.0                         | 21.6 $\pm$ 3.4                 | 16.2 $\pm$ 0.6                       |
|                | <i>Gardenia thunbergii</i>        | Pietermaritz<br>burg | 6                          | 93 $\pm$ 3.8                | 103 $\pm$ 3.4                         | 13.7 $\pm$ 4.6                 | 18.8 $\pm$ 0.7                       |
|                | <i>Gardenia volkensii</i>         | Ndumo                | 5                          | 118 $\pm$ 8.6               | 136 $\pm$ 7.4                         | 12.6 $\pm$ 3.7                 | 16.5 $\pm$ 0.8                       |
| Capparaceae    | <i>Cladostemon kirkii</i>         | Tembe                | 9                          | -                           | 75 $\pm$ 4.3                          | 11.4 $\pm$ 2.6                 | 12.7 $\pm$ 0.3                       |
| Convolvulaceae | <i>Ipomea alba</i>                | Pietermaritz<br>burg | 8                          | 103 $\pm$ 1.1               | -                                     | 22.4 $\pm$ 13.7                | 38.5 $\pm$ 0.8                       |
|                | <i>Hedychium<br/>gardnerianum</i> | Pietermaritz<br>burg | 6                          | 58 $\pm$ 1.4                | 123 $\pm$ 0.6                         | 10.1 $\pm$ 1.8                 | 29.7 $\pm$ 0.4                       |
| Liliaceae      | <i>Lilium formosanum</i>          | Wahroonga            | 22                         | 122 $\pm$ 2.9               | 140 $\pm$ 2.9                         | 47.0 $\pm$ 7.3                 | 36.1 $\pm$ 2.0                       |

Table S3. Hawkmoths observed on long-tubed flowers of plant species in South Africa, indicating their proboscis length and site of pollen placement.

| Family         | Species                       | Study site       | Observation nights | Hawkmoth species <sup>1</sup> (number observed) | Proboscis length (mm) X ± SD (number captured) | Confirmed pollen placement |
|----------------|-------------------------------|------------------|--------------------|-------------------------------------------------|------------------------------------------------|----------------------------|
| Amaryllidaceae | <i>Crinum macowanii</i>       | Vernon Crookes   | 3                  | A.c. (12)                                       | 100 ± 14.0 (18)                                | Thorax (ventral)           |
|                | <i>Crinum bulbispermum</i>    | Greytown         | 4                  | A.c. (>20)                                      | 108 ± 13 (5)                                   | Thorax (ventral)           |
|                |                               | Midmar           | 2                  | A.c. (> 30)                                     | 98 ± 4.0 (3)                                   | Thorax (ventral)           |
|                | <i>Crinum delagoanse</i>      | St Lucia         | 2                  | A.c. (8)                                        | 125 ± 11(4)                                    | Thorax (ventral)           |
|                |                               | Amatikulu        | 2                  | A.c. (1)                                        | 111 ± 0 (1)                                    | Thorax (ventral)           |
| Orchidaceae    | <i>Rangaeris muscicola</i>    | Umtamvuna        | 8                  | A.c. (4)                                        | 118 ± 12 (3)                                   | Proboscis                  |
| Iridaceae      | <i>Gladiolus longicollis</i>  | Mt Gilboa        | 7                  | A.c. (0)                                        | 103 ± 7 (15)                                   | Head (dorsal)              |
|                |                               | Vernon Crookes   | 6                  | A.c. (4)                                        | 100 ± 14.0 (18)                                | Head (dorsal)              |
| Orobanchaceae  | <i>Harveya speciosa</i>       | Fort Nottingham  | 4                  | A. c (1)                                        | -                                              | Proboscis                  |
| Pedaliaceae    | <i>Sesamothamnus lugardii</i> | Mapungubwe       | 3                  | A. c. (7)                                       | 125 ± 0.0 (1)                                  | Proboscis/head             |
|                |                               | Stainbank        | 4                  | C.m. (5), N.a (5)                               | 89 ± 0.0 (1)                                   | Proboscis/head             |
| Rubiaceae      | <i>Gardenia thunbergii</i>    | Pietermaritzburg | 7                  | A.c. (>50)                                      | 85 ± 0.0 (1)                                   | Proboscis/head             |
|                |                               | Tembe            | 1                  | A.c. (1)<br>C. m. (10)                          | 116 ± 0 (1)<br>91 ± 8                          | Wings and thorax (ventral) |
| Capparaceae    | <i>Cladostemon kirkii</i>     | St Lucia         | 2                  | A. c (>50)<br>C.m. (> 50)                       |                                                |                            |
|                |                               | Pietermaritzburg | 4                  | A.c (>100).                                     | 117 ± 0.0 (1)                                  | Proboscis/head             |
| Convolvulaceae | <i>Ipomea alba</i>            | Pietermaritzburg | 4                  | A.c (>100).                                     | 117 ± 0.0 (1)                                  | Proboscis/head             |
| Zingiberaceae  | <i>Hedychium gardnerianum</i> | Pietermaritzburg | 4                  | A.c. (>20)                                      | -                                              | Head (dorsal)              |
| Liliaceae      | <i>Lilium formosanum</i>      | Wahroonga        | 4                  | A.c. (156)                                      | 101 ± 6.3 (7)                                  | Wings and thorax (ventral) |

<sup>1</sup>A.c. = *Agrius convolvuli*, C. m. = *Coelonia mauritii*, N.a. = *Nephele accentifera accentifera*

Table S4. Plant species in Kenya with floral tubes greater than 80 mm in length (adapted from Martins and Johnson, 2013). \* = taxa that also occur in South Africa. # = confirmation of pollination by *Agrius convolvuli*.

| Family         | Species                                                                | Flower colour | Floral tube length (mm) |
|----------------|------------------------------------------------------------------------|---------------|-------------------------|
| Acanthaceae    | <i>Ruellia megachlamys</i> S. Moore                                    | white         | 78-130                  |
|                | <i>Thunbergia guerkeana</i> Lindau                                     | white         | 85-130                  |
| Amaryllidaceae | <i>Ammocharis tinneana</i> (Kotschy & Peyr. ) Milne-Redh. & Schweick # | pink          | 90                      |
|                | <i>Crinum kirkii</i> Baker                                             | white         | 100+                    |
|                | <i>Crinum macowanii</i> Baker*#                                        | white         | 120                     |
|                | <i>Crinum papillosum</i> Nordal                                        | white         | 100+                    |
|                | <i>Crinum zeylanicum</i> L                                             | white-pink    | 100                     |
|                | <i>Cyrtanthus salmonoides</i> P.R.O.Bally & S.Carter                   | pink          | 100                     |
|                | <i>Pancratium tenuifolium</i> Hochst.                                  | white         | 140                     |
| Balsaminaceae  | <i>Impatiens sodenii</i> Engl. & Warb. ex Engl.                        | white, pink   | 100+                    |
| Caesalpinaceae | <i>Gigasiphon macrosiphon</i> (Harms) Brenan                           | white, yellow | 100+                    |
| Capparaceae    | <i>Cladostemon kirkii</i> (Oliv.) Pax & Gilg *                         | white, yellow | 160                     |
|                | <i>Ritchiea capparoides</i> Britten                                    | white, green  | 80                      |
| Convolvulaceae | <i>Ipomoea lapidosa</i> Vatke                                          | white         | 75                      |
|                | <i>Ipomoea longituba</i> Hallier f.                                    | white         | 110                     |
|                | <i>Turbina stenosisiphon</i> (Hallier f.) A.Meeuse                     | white         | 110-130                 |
| Crassulaceae   | <i>Kalanchoe marmorata</i> Baker                                       | white         | 80                      |
| Iridaceae      | <i>Gladiolus ukambanensis</i> (Baker)Marais#                           | white         | 110                     |
| Meliaceae      | <i>Turraea floribunda</i> Hochst                                       | white         | 84-105                  |
| Orchidaceae    | <i>Aerangis brachycarpa</i> (A.Rich.) Durand & Schinz #                | white         | 120-170                 |
|                | <i>Aerangis coriacea</i> Summerh                                       | white         | 110-170                 |
|                | <i>Aerangis kotschyana</i> Schltr.                                     | white         | 130-250                 |
|                | <i>Aerangis somalensis</i> Schltr.                                     | white         | 100-150                 |
|                | <i>Aerangis thomsonii</i> Schltr.                                      | white         | 100-150                 |
|                | <i>Angraecum infundibulare</i> Lindl.                                  | green-cream   | 160-120                 |
|                | <i>Bonatea steudneri</i> T.Durand & Schinz *                           | white-green   | 100-120                 |
|                | <i>Habenaria altior</i> Rendle                                         | white-green   | 150-220                 |
|                | <i>Habenaria armatissima</i> Rchb.f.                                   | white-green   | 80-220                  |
|                | <i>Habenaria attenuate</i> Hook.f.                                     | green         | 100-160                 |
|                | <i>Habenaria cavatibrachia</i> Summerh.                                | white-green   | 100-140                 |

|             |                                                           |                  |         |
|-------------|-----------------------------------------------------------|------------------|---------|
|             | <i>Habenaria cirrhata</i> Rchb.f.                         | white-green      | 130-220 |
|             | <i>Habenaria egregia</i> Summerh.                         | white-green      | 130-190 |
|             | <i>Habenaria macrura</i> Kraenzl.                         | white            | 90-170  |
|             | <i>Habenaria macruroides</i>                              | white            | 100-140 |
|             | <i>Habenaria walleri</i> Rchb.f.                          | white-green      | 130-170 |
|             | <i>Jumellea usambarensis</i> J.J.Wood                     | white            | 80-90   |
|             | <i>Rangaeris amanuensis</i> (Kraenzl.)Summerh.#           | white            | 80-160  |
|             | <i>Tridactyle tricuspis</i> Schltr.                       | green-cream      | 120-150 |
| Pedaliaceae | <i>Sesamothamnus rivae</i> Engl.                          | white            | 80-130  |
| Rubiaceae   | <i>Conostomium quadrangulare</i> (Rendle) Cufod.          | white            | 120     |
|             | <i>Gardenia posoquerioides</i> S. Moore                   | white            | 90-125  |
|             | <i>Gardenia ternifolia</i> Schumach. & Thonn.             | white            | 110     |
|             | <i>Gardenia volkensii</i> K. Schum.*                      | white            | 130     |
|             | <i>Oxyanthus pyriformis longitubus</i> (Skeels) Bridson   | white            | 110-160 |
|             | <i>Oxyanthus zanguebaricus</i> (Hiern) Bridson            | white            | 75-114  |
|             | <i>Rothmannia fischeri</i> (K.Schum.) Bullock in Oberm.   | cream-red spots  | 50-110  |
|             | <i>Rothmannia longiflora</i> Salisb.                      | purple-green     | 140-180 |
|             | <i>Rothmannia macrosiphon</i> (K.Schum. ex Engl.) Bridson | white, red spots | 135-240 |
| Solanaceae  | <i>Datura metel</i> L.                                    | cream            | 120     |
| Verbenaceae | <i>Clerodendrum rotundifolium</i> Oliv.                   | white            | 62-118  |
|             | <i>Clerodendrum fischeri</i> Gürke ex Engl.               | white            | 70-150  |

---

Fig S1. The geographical distribution of invasive plant species with long-tubed flowers in South Africa. In each quarter degree grid square, the number of invasive species is indicated in red font as a subscript below the number of native species in black font.

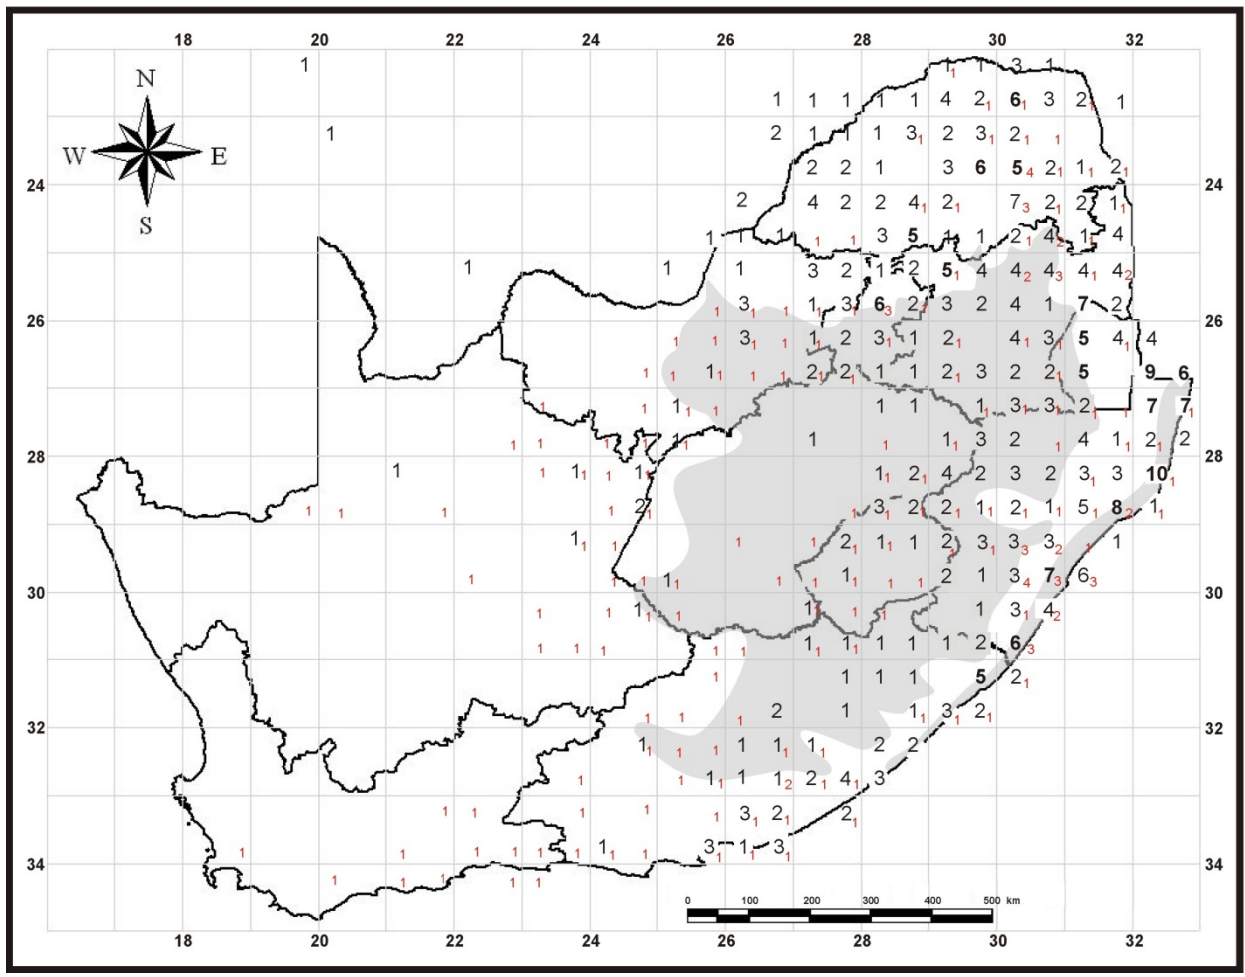

Fig S2 The geographical distribution of the convolvulus hawkmoth *Agrius convolvuli* in South Africa. Values in each degree grid square and the darkness of the shading indicate the percentage of *A. convolvuli* specimens among all hawkmoth specimens recorded in the grid square. No hawkmoths were recorded for unshaded squares.

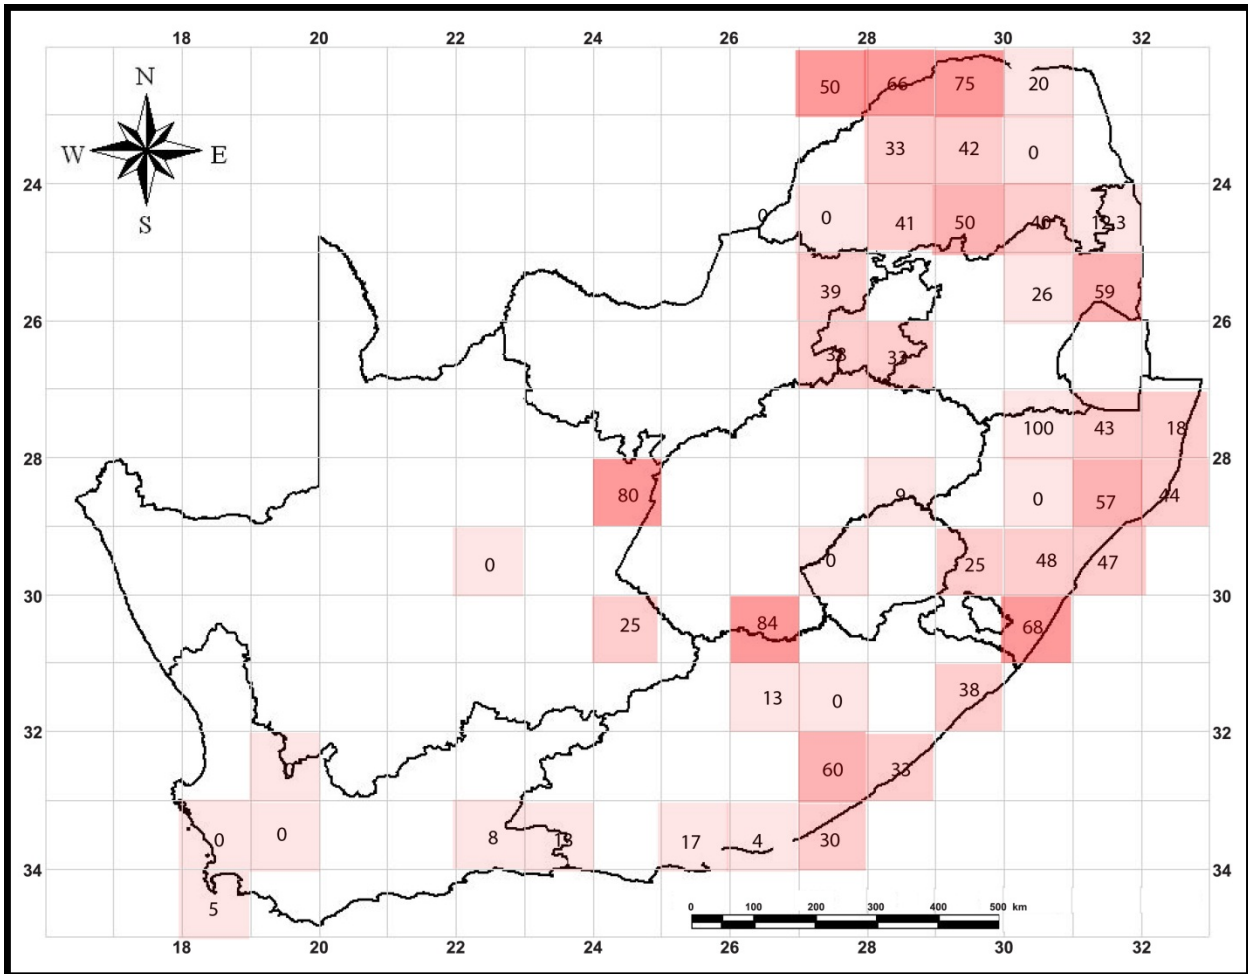

Supplement: supp_mcv137_aob-15370-s01.pdf [file supp_mcv137_aob-15370-s01.pdf]
